# Supplementary material
Source: PubMed Central journal article supplement (PMC9857179)
Supplement: jama-e2221471-s001.pdf [file jama-e2221471-s001.pdf]

## Data Sharing Statement

Roland. Association Between Doses of Levonorgestrel Intrauterine Systems and Subsequent Use of Psychotropic Drugs in France. *JAMA*. Published December 22, 2022.

doi:10.1001/jama.2022.21471

### Data

**Data available:** No

### Additional Information

**Explanation for why data not available:** According to data protection and French regulation, the authors cannot publicly release the data from the French national health data system (SNDS). However, any person or structure, public or private, for-profit or nonprofit, is able to access SNDS data upon authorization from the French Data Protection Office (CNIL Commission Nationale de l'Informatique et des Libertés) to carry out a study, a research, or an evaluation of public interest (<https://www.snds.gouv.fr/SNDS/Processus-d-acces-aux-donnees> and <https://www.indiante.fr/>).
